# Supplementary material for: A dynamic irradiation-responsive material for advanced anti-counterfeiting in dark and bright fields
Source: Royal Society of Chemistry journal article supplement (doi:10.1039/d2tc00215a), 2022-01-01
Supplement: d2tc00215a3.pdf [file d2tc00215a3.pdf]

## Dynamic irradiation-responsive materials for advanced anti-counterfeiting in dark and bright fields

Wenbo Dong <sup>†</sup>, Wenxiang Wang <sup>†</sup>, Mingyu Wang, Jiachi Zhang <sup>\*</sup> and Yuhua Wang <sup>\*</sup>

National & Local Joint Engineering Laboratory for Optical Conversion Materials and Technology, Lanzhou University, Lanzhou 730000, P. R. China

<sup>†</sup>These authors contributed equally to this work.

<sup>\*</sup>Authors to whom correspondence should be addressed:

Dr. Jiachi Zhang, Email: zhangjch@lzu.edu.cn

Dr. Yuhua Wang, Email: wyh@lzu.edu.cn

Tel.: +86-931-8912772, Fax: +86-931-8913554

**Table S1.** Crystallographic data of CaZnGe<sub>2</sub>O<sub>6</sub>

| Formula                       | CaZnGe <sub>2</sub> O <sub>6</sub> |
|-------------------------------|------------------------------------|
| Crystal system                | Monoclinic                         |
| Space group                   | C 1 2/c 1                          |
| Lattice parameters            |                                    |
| a(Å)                          | 10.16020                           |
| b(Å)                          | 9.00979                            |
| c(Å)                          | 5.43341                            |
| $\alpha^\circ=\gamma^\circ$   | 90                                 |
| $\beta^\circ$                 | 105                                |
| Cell volume (Å <sup>3</sup> ) | 480.483                            |
| T/K                           | 296                                |
| Diffractometer                | Rigaku D/Max-2400                  |
| Radiation/Å                   | Cu-Ka ( $\lambda=1.5405$ )         |
| Absorption correction         | multi-scan                         |
| 2 $\theta$ range $^\circ$ /   | 5-140                              |
| Z                             | 4                                  |
| Calculated Density            | 4.7986g/cm <sup>3</sup>            |
| R-factors                     |                                    |
| Rwp                           | 11.48%                             |
| $\chi^2$                      | 1.88                               |
| RExp                          | 6.11%                              |

**Table S2.** Three cation sites Ion radius and electronegativity of Ca<sup>2+</sup>, Zn<sup>2+</sup>, and Ge<sup>4+</sup> ions in CaZnGe<sub>2</sub>O<sub>6</sub>.

| Vector | Ion radius (Å) | Electronegativity |
|--------|----------------|-------------------|
| Ca (8) | 1.12           | 1.160             |
| Zn (6) | 0.74           | 1.336             |
| Ge (4) | 0.39           | 1.854             |

**Table S3.** Ion radius and electronegativity of  $\text{Ca}^{2+}$ ,  $\text{Zn}^{2+}$ ,  $\text{Pb}^{2+}$  and  $\text{Ge}^{4+}$  ions in  $\text{CaZnGe}_2\text{O}_6$  based on the Hume-Rothery rules.

| Vector | Ion radius ( $\text{\AA}$ ) | $\Delta r$ ( $\text{\AA}$ ) | Error (%) | Electronegativity | Error (%) |
|--------|-----------------------------|-----------------------------|-----------|-------------------|-----------|
| Ca (8) | 1.120                       | 0.170                       | 13.2      | 1.160             | 5.3       |
| Ge (4) | 0.390                       | 0.900                       | 69.8      | 1.854             | 51.3      |
| Zn (6) | 0.740                       | 0.550                       | 42.6      | 1.336             | 9.1       |
| Pb (8) | 1.290                       | --                          | --        | 1.225             | --        |

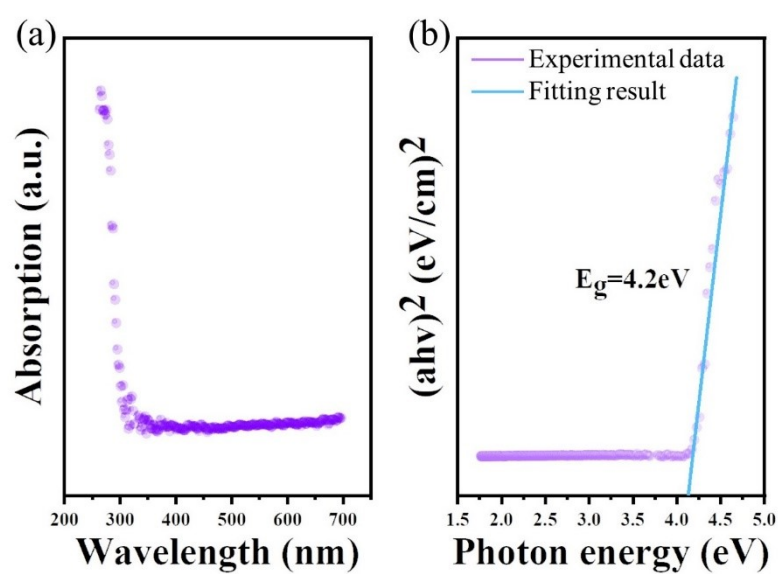

**Figure S1.** Absorption spectrum of  $\text{CaZnGe}_2\text{O}_6$  and the fitting result of band gap.

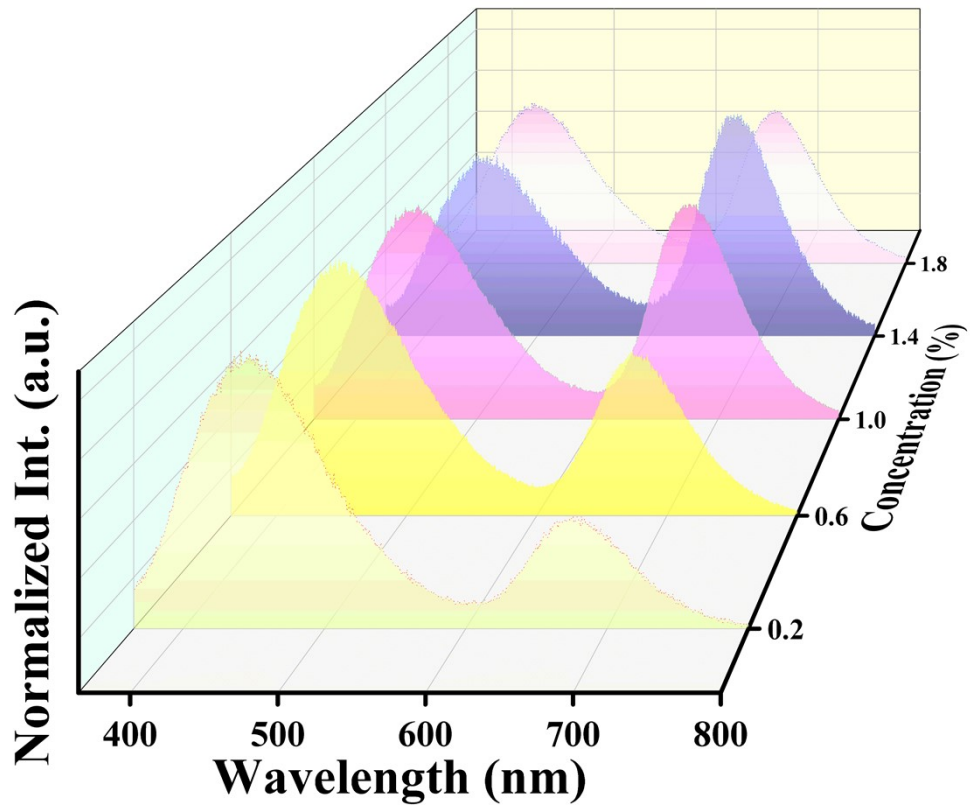

Figure S2. PL of the CZGO:  $x\%Pb^{2+}$  materials ( $x=0.2\%,0.6\%,1.0\%,1.4\%,1.8\%$ )

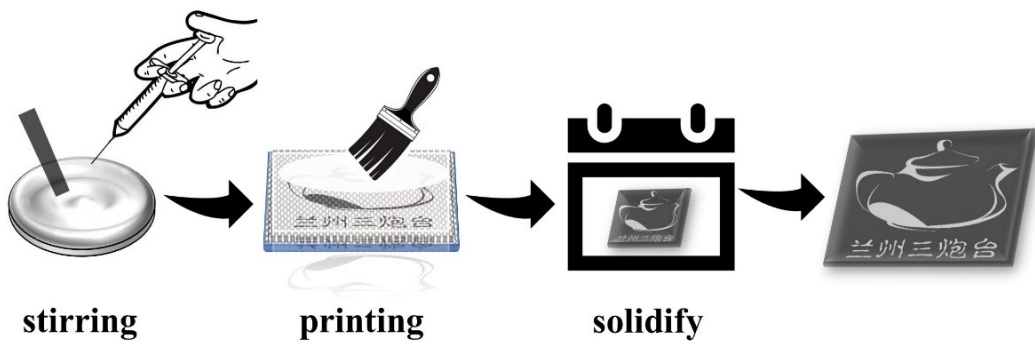

Figure S3. Fabrication process of the luminescent anti-counterfeiting image.

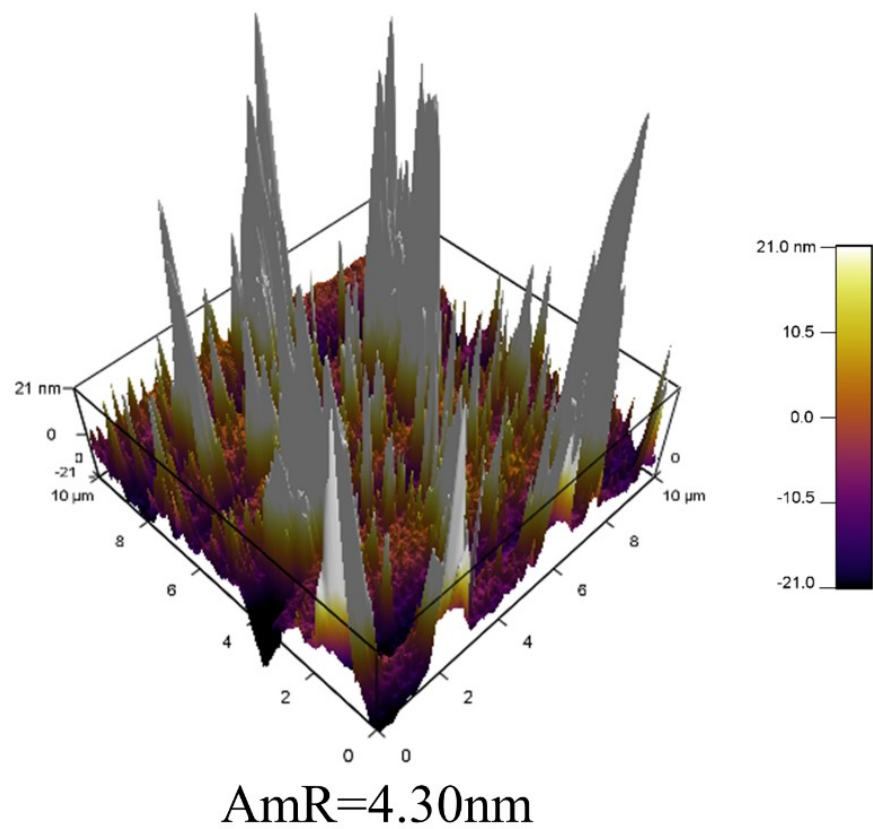

**Figure S4.** The 3D roughness of compounds measured by MFP-3D.
